# Supplementary material for: In vitro metabolic zonation through oxygen gradient on a chip
Source: PubMed Central journal article supplement (PMC6753109; doi:10.1038/s41598-019-49412-6), 2019-09-19
Supplement: 41598_2019_49412_MOESM1_ESM.pdf [file 41598_2019_49412_MOESM1_ESM.pdf]

# ***In vitro* metabolic zonation through oxygen gradient on a chip**

Federica Tonon<sup>1,¶</sup>, Giovanni Giuseppe Giobbe<sup>2,3¶</sup>, Alessandro Zambon<sup>3</sup>, Camilla Luni<sup>4</sup>, Onelia Gagliano<sup>3,6</sup>, Annarosa Floreani<sup>5</sup>, Gabriele Grassi<sup>1</sup> and Nicola Elvassore<sup>2,3,4,6\*</sup>

<sup>1</sup> Dept. of Life Sciences, University of Trieste, Trieste, 34127, Italy

<sup>2</sup> Stem Cell and Regenerative Medicine Section, UCL GOS Institute of Child Health, London, WC1N 1EH, UK

<sup>3</sup> Dept. of Industrial Engineering, University of Padova, Padova, 35131, Italy

<sup>4</sup> Shanghai Institute for Advanced Immunochemical Studies (SIAIS) ShanghaiTech University, Shanghai, 201210, China

<sup>5</sup> Dept. of Surgery, Oncology and Gastroenterology, University of Padova, Padova, 35121, Italy

<sup>6</sup> Venetian Institute of Molecular Medicine, Padova, 35129, Italy

\* Corresponding author [nicola.elvassore@unipd.it](mailto:nicola.elvassore@unipd.it)

¶ First co-authorship: Federica Tonon and Giovanni Giuseppe Giobbe contributed equally to this work.

## Supplementary Figures

A

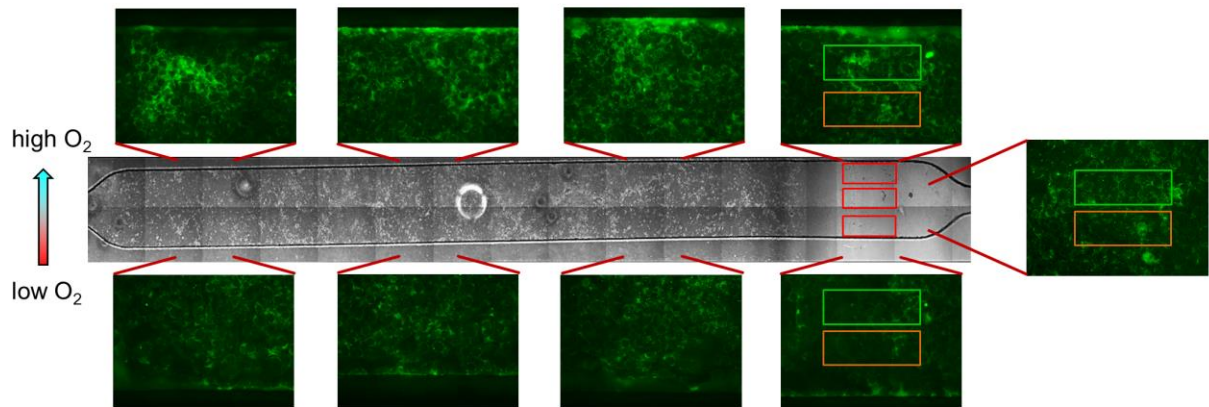

B

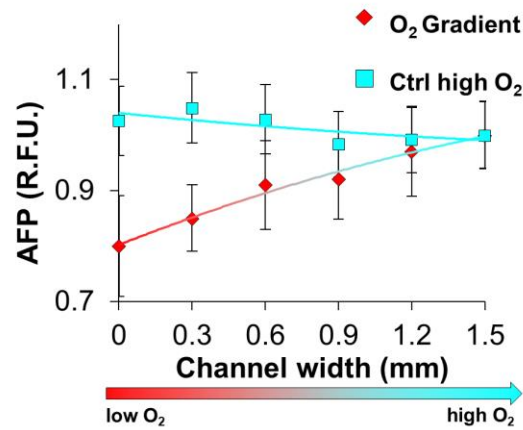

**Supplementary Figure 1.** (A) Alpha-fetoprotein immunostaining (green) at the different sides of the microfluidic channel with oxygen gradient applied from day 1 (hESCs) to day 8 (hepatic endoderm) of differentiation, and the 6 regions of interest (ROI) selected for fluorescence quantification. (B) Relative fluorescence unit plot of control chip not exposed to gradient and cultured at standard high O<sub>2</sub> (21%) and gradient chips that shows differential expression of alpha-fetoprotein across the gradient.

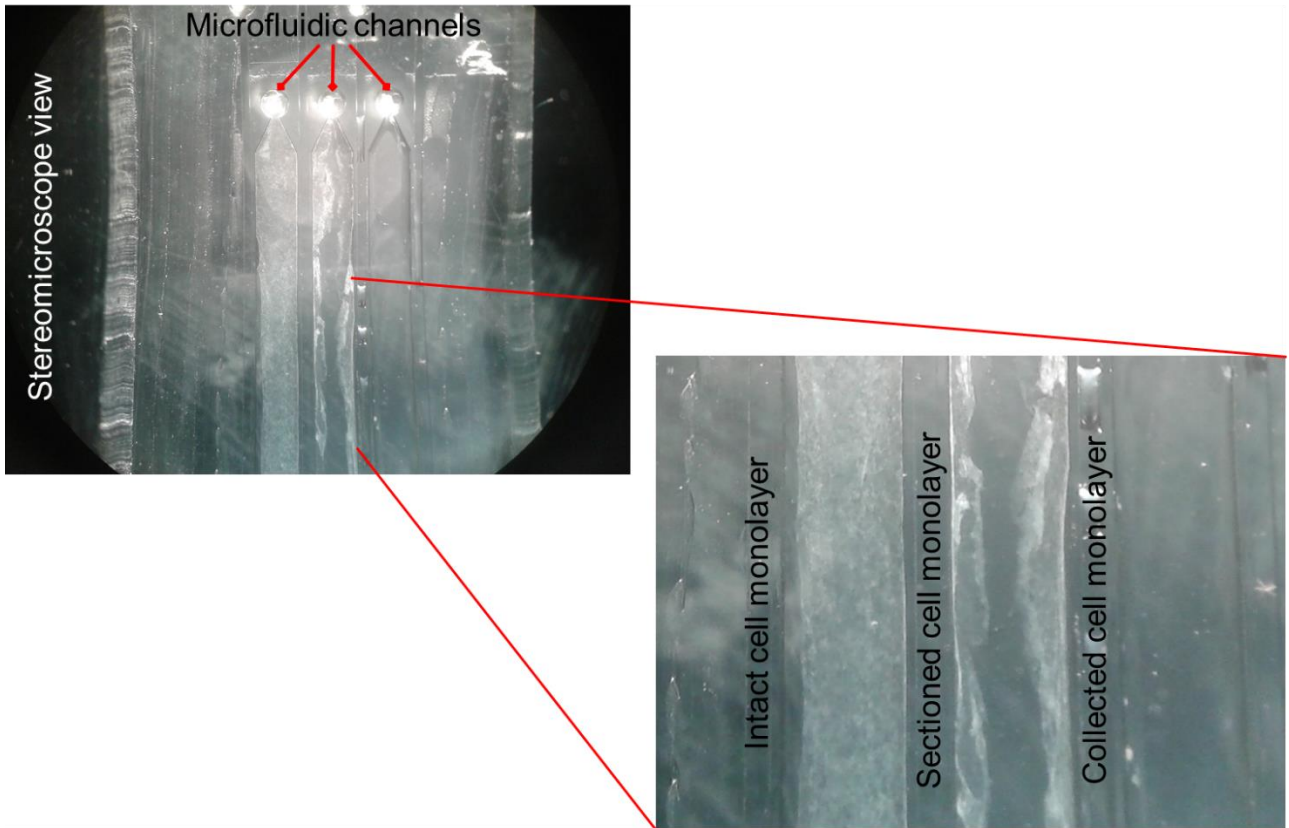

**Supplementary Figure 2.** Stereomicroscope manual picking of the two sides of the hESC-hepatocyte monolayer within the microfluidic channel for RNA collection.

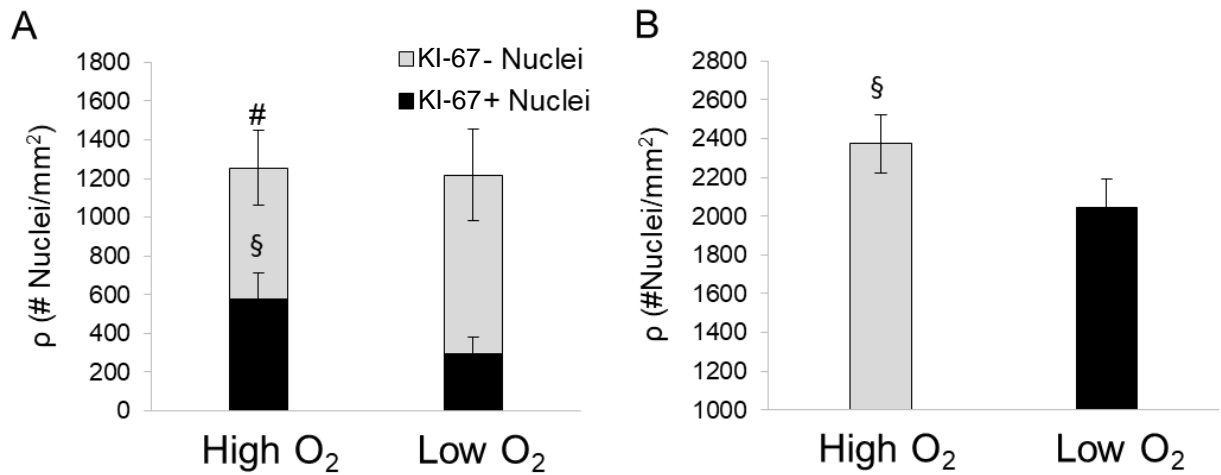

**Supplementary Figure 3.** Evaluation of the proliferative potential of hepatocyte-like cells differentiated and grown on plate or on a microfluidic device. (A) Quantification of KI-67 immunostaining in hepatocyte-like cells obtained differentiating hESCs grown on a plate at low (<5%) or high (21%) oxygen. Cells differentiated at high O<sub>2</sub> show a higher amount of KI-67 positive nuclei compared to cells grown at low oxygen. Data are shown as mean  $\pm$  SD, n=25. p $\S$  < 0.0001 respect to KI-67+ nuclei at low (<5%) oxygen and p# < 0.05 respect to KI-67 – nuclei at low (<5%) oxygen. (B) Nuclei counting of hepatocyte-like cells obtained from hESC grown on a microfluidic device. On the side with higher O<sub>2</sub>, more nuclei were observed compared to the other side of the chamber (low O<sub>2</sub>). Data are shown as mean  $\pm$  SD. n=55. p $\S$  < 0.0001 respect to low O<sub>2</sub>.
